# Supplementary material
Source: publisher figshare collection journal article supplement (https://frontiersin.figshare.com/ndownloader/files/25544474)
Supplement: Supplementary file 1 [file 25544474]

### **List of Supplementary Figures**

**Supplementary Figure 1:** Size distribution graphs of the CZNPs made with 18 nm ZnO.

**Supplementary Figure 2:** Size distribution graphs of the CZNPs made with 50 nm ZnO.

**Supplementary Figure 3:** Size distribution graphs of the CZNPs made with 100 nm ZnO.

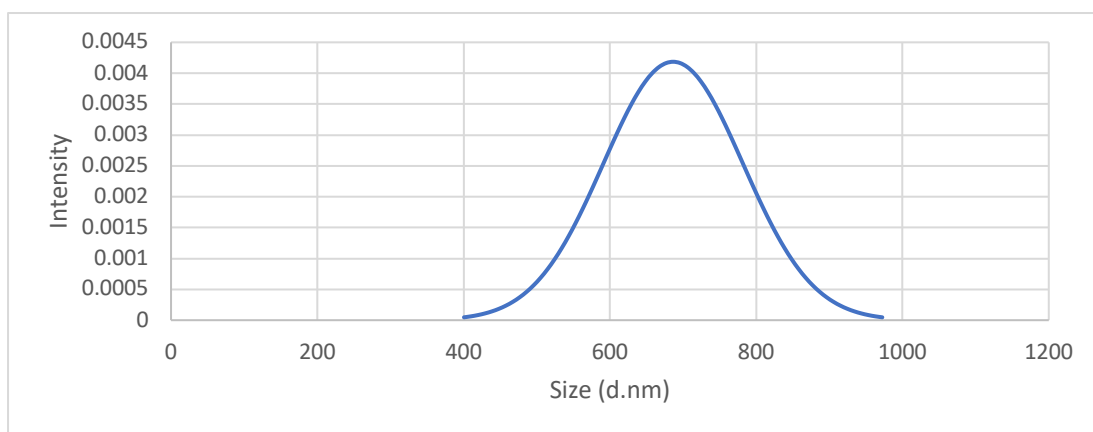

**Supplementary Figure 1**

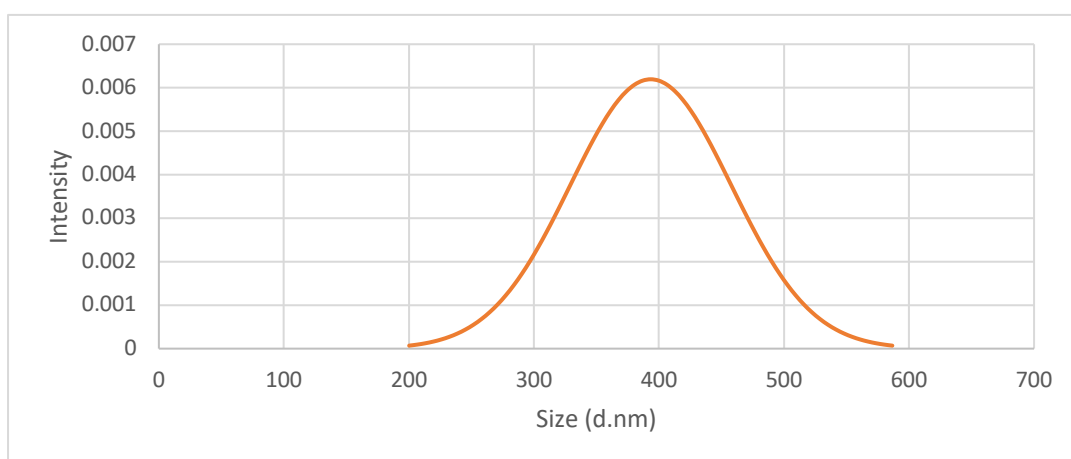

**Supplementary Figure 2**

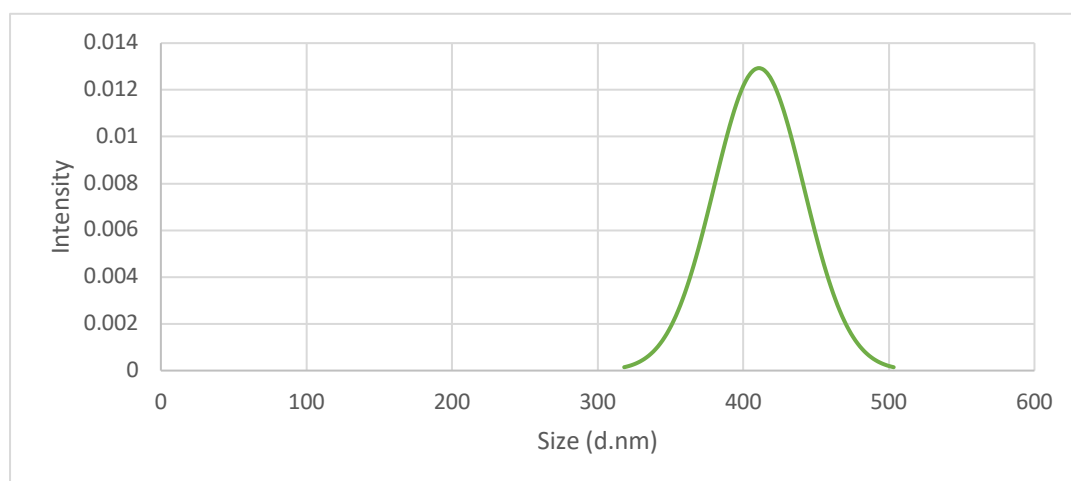

**Supplementary Figure 3**
